# Supplementary material
Source: PubMed Central journal article supplement (PMC3459461)
Supplement: supp_dds270_dds270supp.pdf [file supp_dds270_dds270supp.pdf]

## **SUPPLEMENTARY MATERIAL**

The macrosatellite DXZ4 mediates CTCF-dependent long-range intrachromosomal interactions on the human inactive X chromosome

Andrea H Horakova, Shawn C Moseley, Christine R McLaughlin, Deanna C Tremblay & Brian P Chadwick

Department of Biological Science, Florida State University, Tallahassee, Florida 32306-4295, USA

Correspondence should be addressed to B.P.C. ([chadwick@bio.fsu.edu](mailto:chadwick@bio.fsu.edu)).

## SUPPLEMENTARY FIGURES

**Supplementary Figure 1** Physical maps of regions assessed by chromosome conformation capture (3C). For the three regions (DXZ4, X56, and X130) schematic *Hind*III restriction maps are shown. The locations of *Hind*III sites are indicated (H) above each map. The size of each schematic is indicated in kilobases (kb) above the double-headed arrow below each map. The locations of putative CTCF binding sites are highlighted in blue and indicated by the annotated downward facing arrows. For X56 and X130, a regional overview map is shown at the top indicating the fragments (Frag-C and Frag-D for X56; Frag-C and Frag-E for X130) that were assessed in conjunction with DXZ4 by 3C. Immediately below each of these regional maps is a schematic map of the corresponding fragments. The locations of primers used in PCR reactions to assess the 3C library are indicated below each fragment map by left- or right-facing labeled arrows. Primer sequences are given in Supplementary Table 3.

# DXZ4

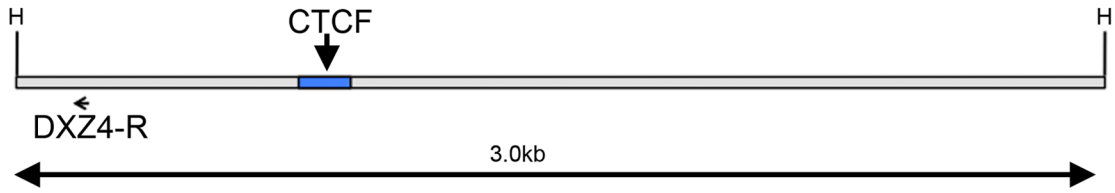

# X56

X56  
Region

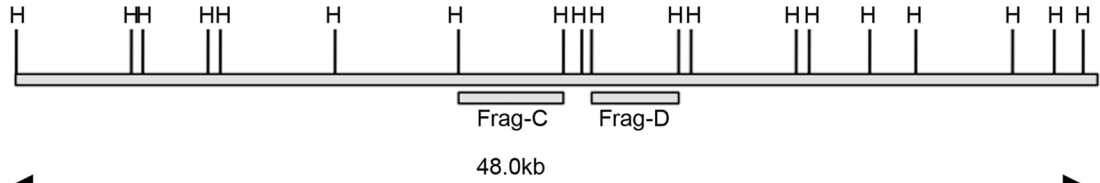

Frag-C

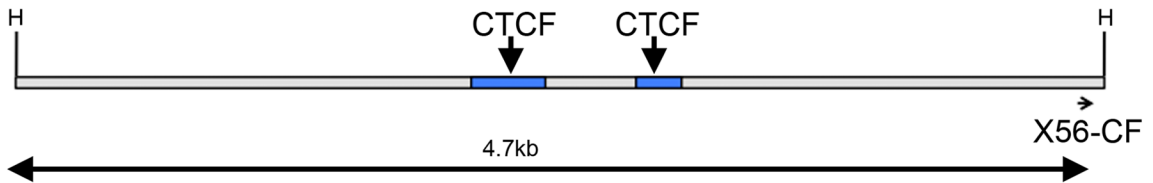

Frag-D

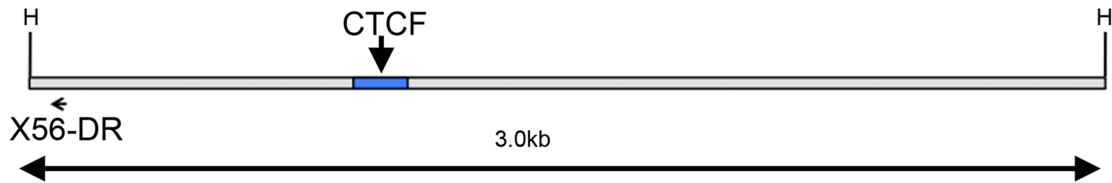

# X130

X130  
Region

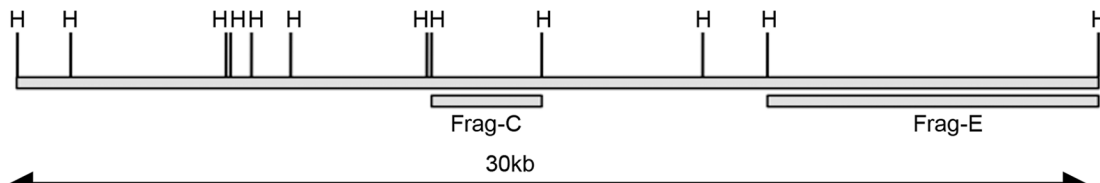

Frag-C

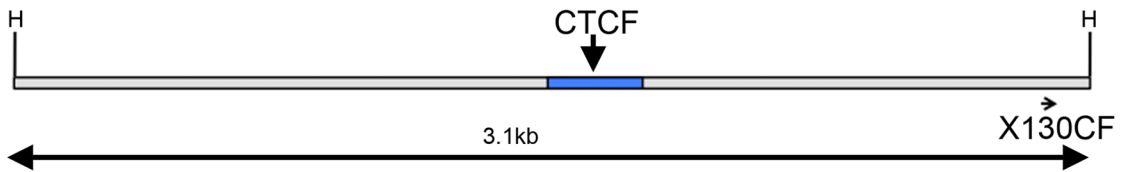

Frag-E

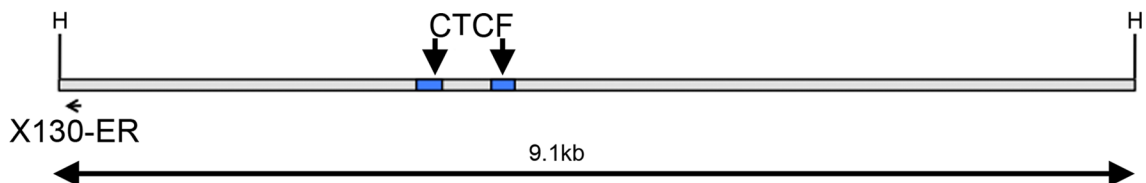

**Supplementary Figure 2** Ethidium-bromide-stained agarose gels showing examples of PCR analysis of *Hind*III 3C libraries. PCR was performed for two sites within the X56 locus to DXZ4 (top) and two sites within the X130 locus to DXZ4 (bottom). Samples shown are for two independent male and female normal diploid cell lines as well as a BAC control. The molecular-weight marker is indicated, and the sizes given in base pairs to the left of each gel.

# X56-DXZ4

## X56-CF

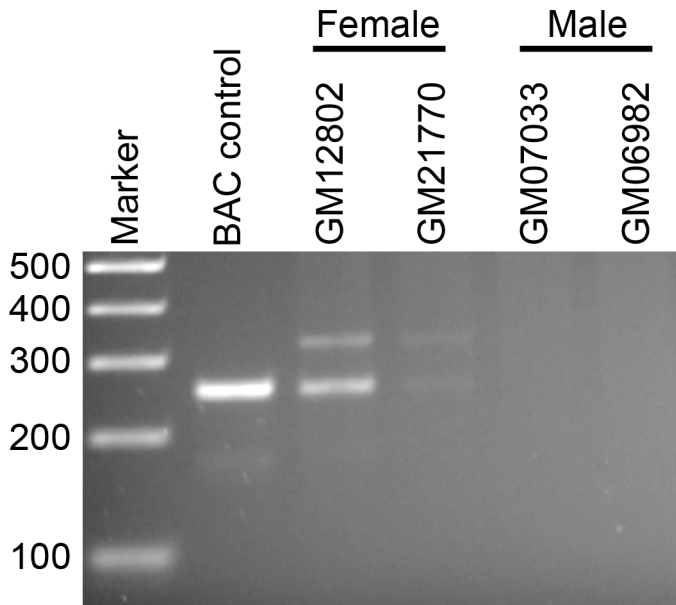

## X56-DR

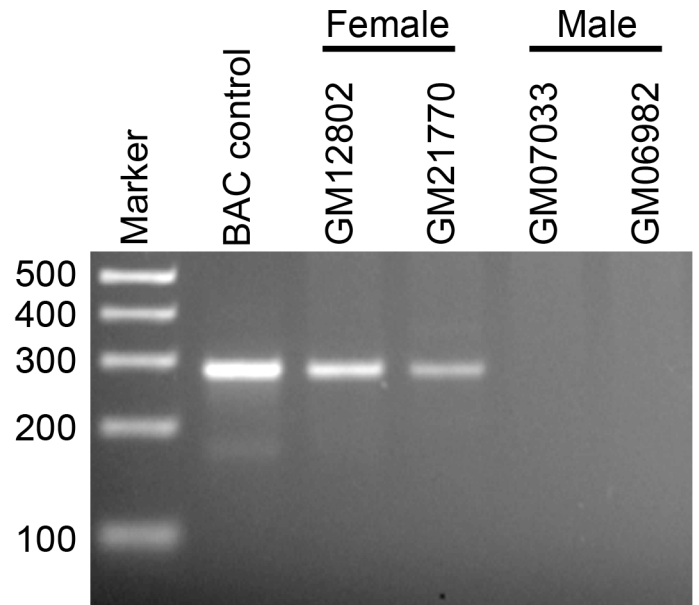

# X130-DXZ4

## X130-CF

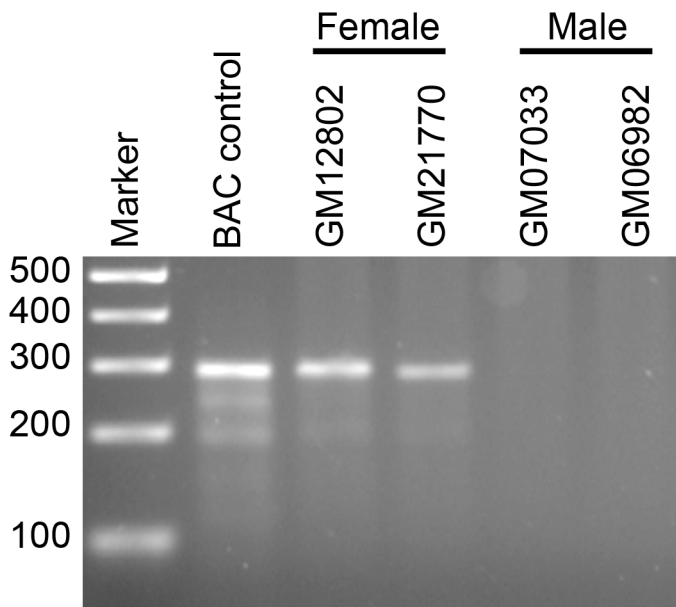

## X130-ER

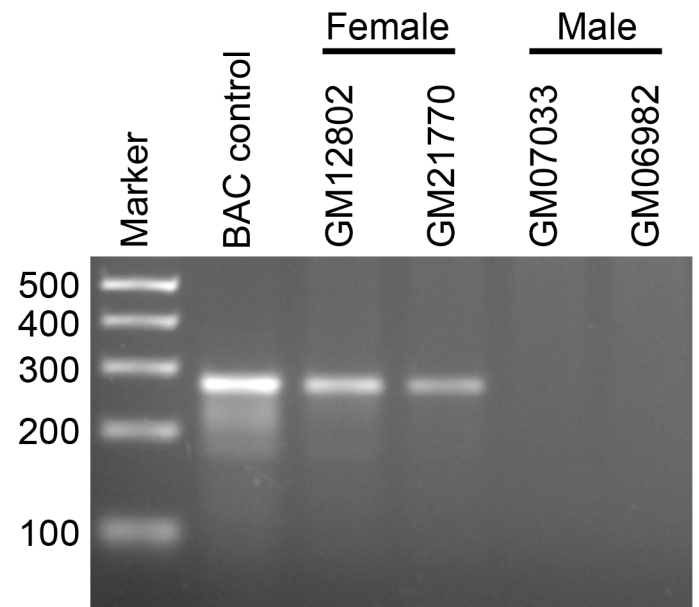

**Supplementary Figure 3** Anti-H3K4me2 indirect immunofluorescence coupled with DXZ4 FISH in Mock treated (Top panels) and CTCF siRNA treated (Bottom panels) hTERT-RPE1 cells. Each panel set shows the distribution of H3K4me2 (Green, left), DXZ4 FISH merged with DAPI (Red and Blue, middle) and H3K4me2 merged with DXZ4 FISH (Green and red, right). The top row for each group shows an example of non-overlapping DXZ4 with H3K4me2 at the Xi and the percentage of cells in that class are indicated to the far right and the number of nuclei examined indicated at the bottom of each group. The bottom row shows an example of colocalized signals. A white arrowhead indicates the location of the Xi, whereas the white arrow indicates the location of the Xa.

Mock

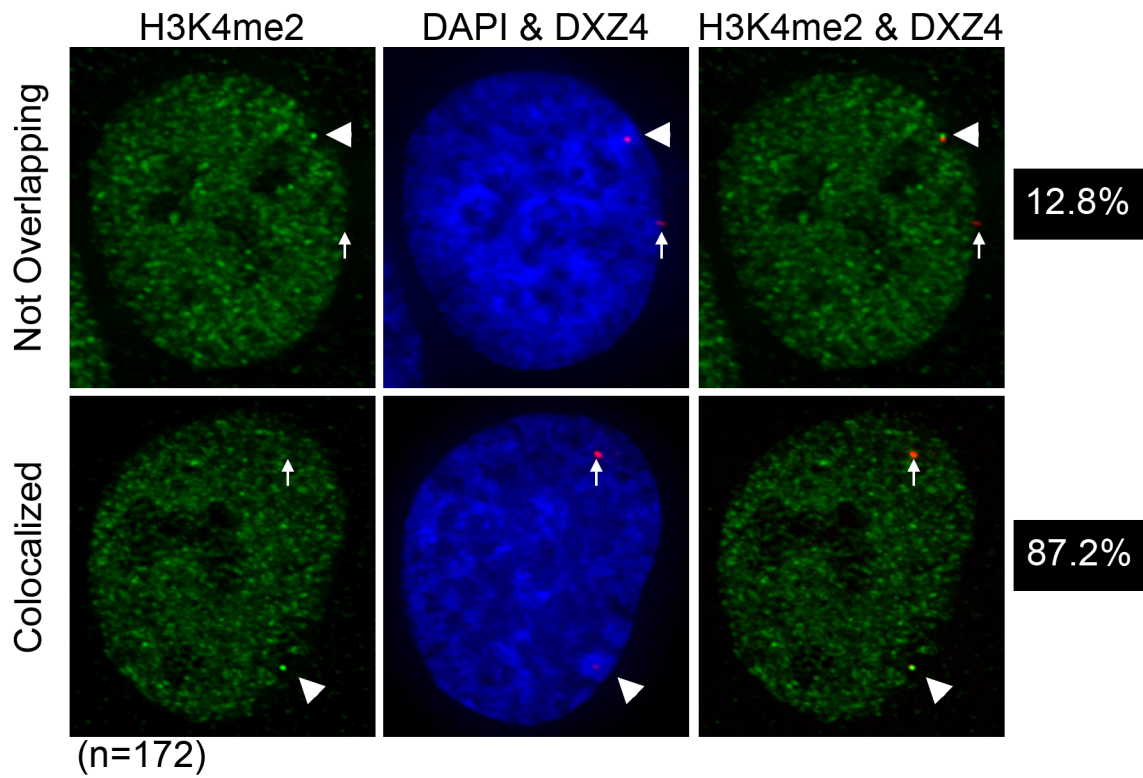

CTCF siRNA

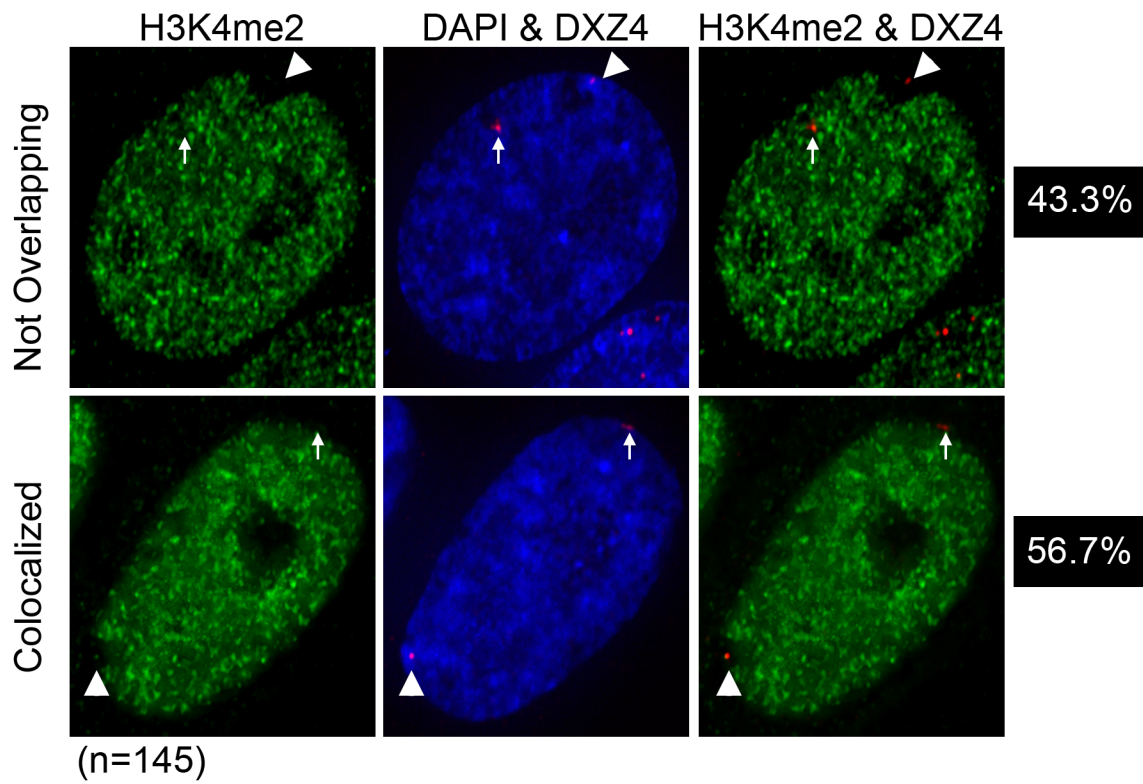

**Supplementary Figure 4** Location of the DXZ4, X56 and X130 tandem arrays at the border of topological domains. Images show a snapshot of the UCSC Genome Browser (<http://genome.ucsc.edu>) with the Topological Domains annotation activated (30). The DXZ4, X56 and X130 browser shots are indicated to the left and the black double-headed arrow above the browser image indicates the approximate location of the corresponding tandem repeat.



# DXZ4

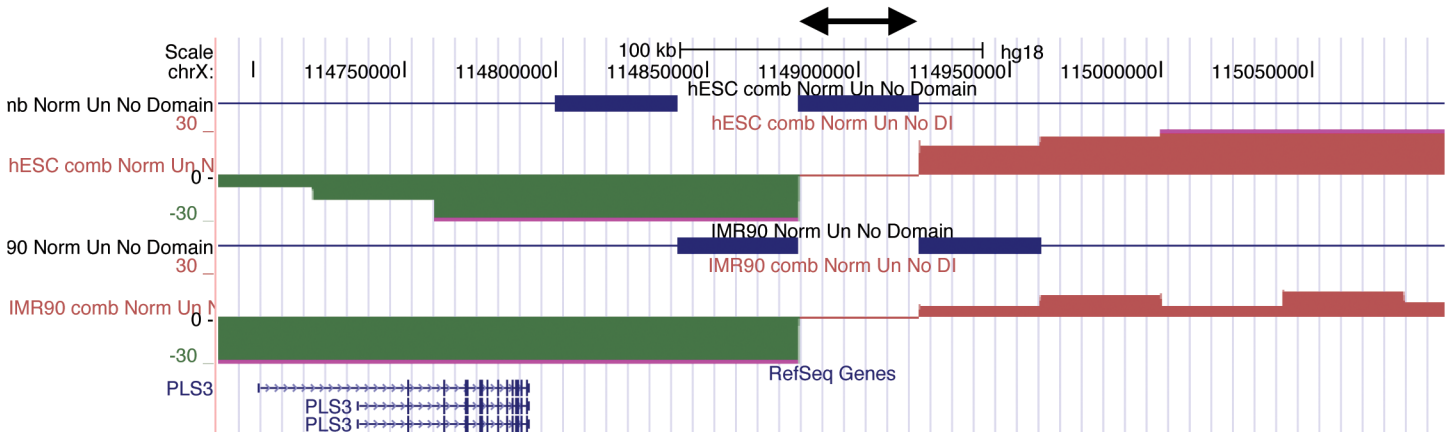

# X56

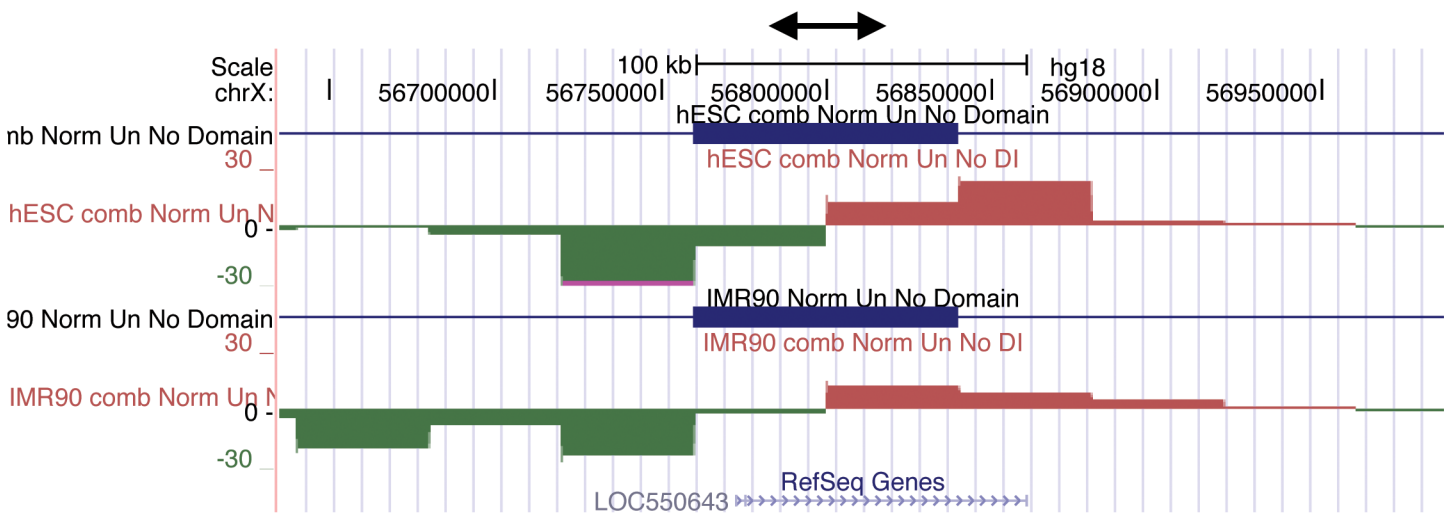

# X130

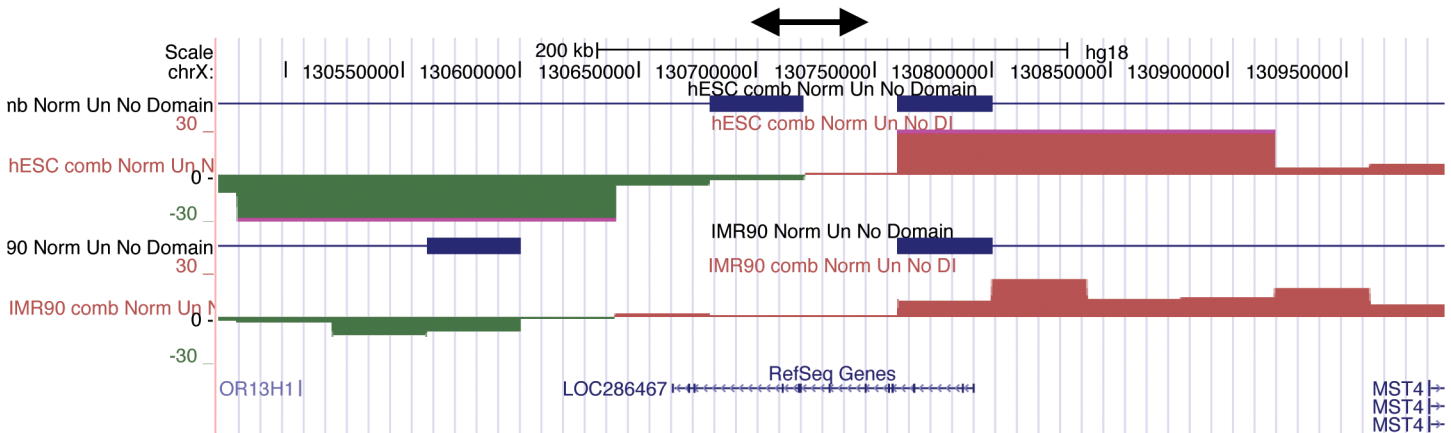

## SUPPLEMENTARY TABLES

**Supplementary Table 1** Oligonucleotides used in this study.

| Oligonucleotide | Sequence              | Application          |
|-----------------|-----------------------|----------------------|
| DXZ4-R          | CTTGCCACCCTGTCTTGTTG  | 3C                   |
| X56-CF          | CGTCTGAACTATATCCTGTCT | 3C                   |
| X56-DR          | CTGTTACCATGACATTTTAC  | 3C                   |
| X130-CF         | CTACTCTTACTCACTCAGCAT | 3C                   |
| X130-ER         | ATATGGAGTAGAACTGCTAGG | 3C                   |
| DXZ4-F23        | GGACAGTCCCAAGCCACTC   | CTCF ChIP analysis   |
| DXZ4-R26        | AGATGCTGATCCGCCATGTG  | CTCF ChIP analysis   |
| X56-XXC1-F      | GTACTIONGGCATTGTGGTGC | CTCF & H3K4me2 ChIP  |
| X56-XXC1-R      | AGCGAGGAGTTCCTCTCTCG  | CTCF & H3K4me2 ChIP  |
| X130-CTCF-3-F   | TGTTTGGTGGCGCCTTTGTG  | CTCF & H3K4me2 ChIP  |
| X130-CTCF-3-R   | TCCACCTTTACCAGACCAG   | CTCF & H3K4me2 ChIP  |
| DXZ4-F19        | GAGATGCCCATGAACTCAAG  | H3K4me2 ChIP         |
| DXZ4-R19        | GCCAGGGGGATAGGTGTG    | H3K4me2 ChIP         |
| X56-EST-F1      | TCTCAGGTCTCTTGGCTTTG  | RT-PCR               |
| X56-EST-R1      | GGGCCTTAATGGATTTATAGG | RT-PCR               |
| X130-EST-F2     | CCGAGTGAAGAGGATTGAAG  | RT-PCR               |
| X130-EST-R2     | CATTTTCAGGGACCTCACAGG | RT-PCR               |
| X56-Prom-F1     | TGTACGTCTCAGGATACAGG  | Luciferase construct |
| X56-Prom-R1     | CTTGGCTTCCCGTGCGTTTC  | Luciferase construct |
| X130-Prom-F1    | TCTCTTCAAGGTCCTCCTAG  | Luciferase construct |
| X130-Prom-R1    | CGTGGTGCCCTCAGGCTCTG  | Luciferase construct |

**Supplementary Table 2** Number of nuclei scored for DXZ4-X56 and DXZ4-X130 interactions by FISH. The number given in column 1 corresponds to the number indicated for males and females in the interaction-frequency graphs in Figure 4A.

| Number | Cells      | Sex    | DXZ4 v X56 | DXZ4 v X130 |
|--------|------------|--------|------------|-------------|
| 1      | GM12802    | Female | 177        | 171         |
| 2      | WI38       | Female | 59         | 60          |
| 3      | IMR90      | Female | 43         | 43          |
| 4      | hTERT-RPE1 | Female | 46         | 51          |
| 5      | GM07059    | Female | 110        | 104         |
| 6      | GM21770    | Female | 101        | 123         |
| 7      | GM07011    | Female | 114        | 108         |
| 8      | GM08728    | Female | 116        | 120         |
| 1      | hTERT-BJ1  | Male   | 58         | 48          |
| 2      | GM06982    | Male   | 63         | 69          |
| 3      | GM07033    | Male   | 105        | 115         |
| 4      | GM07026    | Male   | 103        | 118         |
| 5      | GM07030    | Male   | 101        | 112         |
| 6      | GM08729    | Male   | 107        | 94          |
| 7      | HepG2      | Male   | 121        | 117         |
